# Supplementary material for: Accounting for the effect of forest and fragmentation in probabilistic rockfall hazard
Source: Copernicus journal article supplement (doi:10.5194/nhess-23-2349-2023), 2023-06-28
Supplement: Supplementary file 1 [file nhess-23-2349-2023-supplement.pdf]

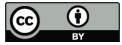

*Supplement of*

## **Accounting for the effect of forest and fragmentation in probabilistic rock-fall hazard**

**Camilla Lanfranconi et al.**

*Correspondence to:* Camilla Lanfranconi (c.lanfranconi2@campus.unimib.it)

The copyright of individual parts of the supplement might differ from the article licence.

## Supplementary material

Table S1. Parameters of the tree-impact algorithm corresponding to a quercus robur tree forest: (i) height of stem [m], (ii) average height of trees [m], (iii) size of crown of tree [m], (iv) average DBH [m], (v) minimum distance between impacts [m], (vi) and maximum amount of kinetic energy that could be dissipated by a tree [J]

| Parameter                                                                | value |
|--------------------------------------------------------------------------|-------|
| height of stem                                                           | 4.85  |
| average height of trees [m]                                              | 14.97 |
| size of crown of tree [m]                                                | 2.9   |
| average diameter at breast height [m]                                    | 0.42  |
| minimum distance between impacts [m]                                     | 10    |
| maximum amount of kinetic energy that could be dissipated by a tree [kJ] | 63.3  |

5

Table S2. Parameters of the fragmentation algorithm: (i) density of the generated fragments [kg/m<sup>3</sup>], (ii) Young's elastic modulus of the rock [Pa], (iii) Poisson's coefficient of the rock [-], (iv) stress at break [Pa].

| Parameter                                 | value   |
|-------------------------------------------|---------|
| Density of fragments [kg/m <sup>3</sup> ] | 2700    |
| Young's modulus [Pa]                      | 4.0E+10 |
| Poisson's ratio [-]                       | 0.23    |
| Limit stress [Pa]                         | 2.2E+08 |

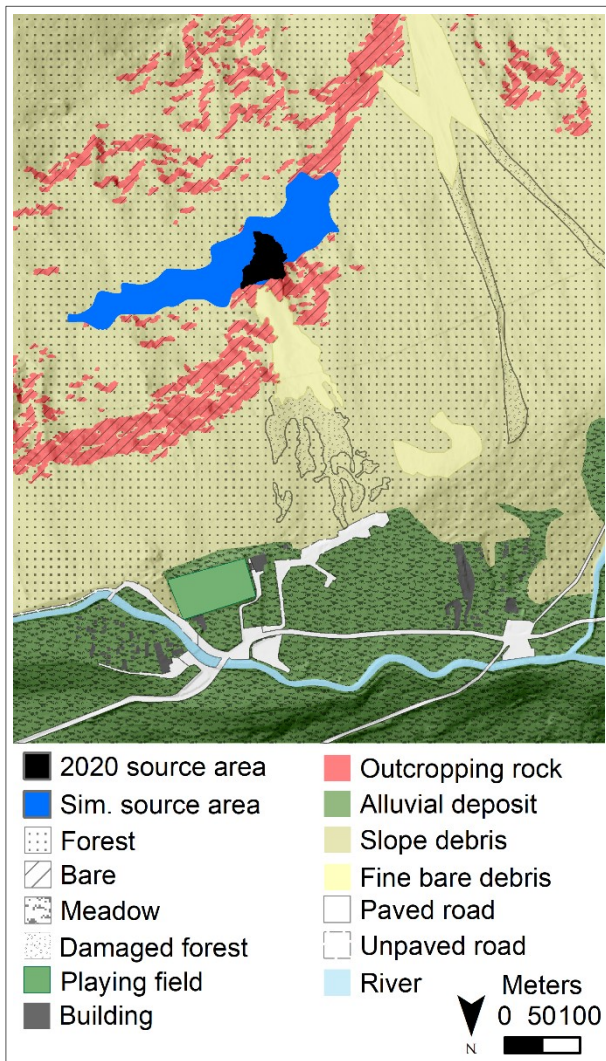

Figure S1 Unique conditions map for the Saint-Oyen case study. The associated values of normal ( $e_n$ ) and tangential restitution ( $e_t$ ) coefficients and of the friction coefficient ( $\mu_s$ ) are reported in Table 1.

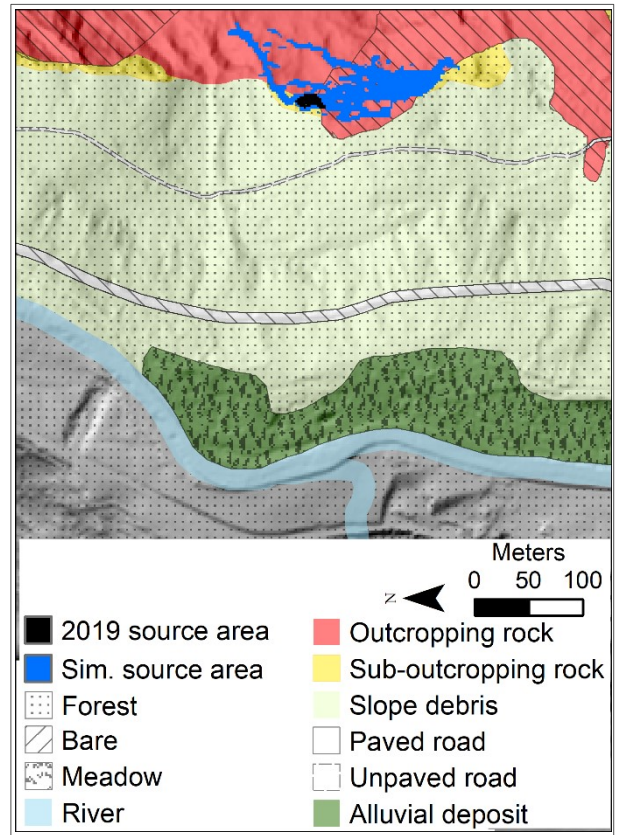

Figure S2 Unique conditions map for the Saint-Oyen case study. The associated values of normal ( $e_n$ ) and tangential restitution ( $e_t$ ) coefficients and of the friction coefficient ( $\mu_s$ ) are reported in Table 2.

*Table S1 List of the numerical simulations together with source area information and the corresponding volumes.*

| <i>ID</i>                    | <i>Block volume</i>     | <i>Launched blocks per cell</i> | <i>Number of source cells</i> | <i>Source Location</i>  | <i>Specific algorithm activated</i> |
|------------------------------|-------------------------|---------------------------------|-------------------------------|-------------------------|-------------------------------------|
| SO_HS_Event                  | 2020 event distribution | 13                              | 2,801                         | 2020 event              | N                                   |
| SO_HS <sub>tree</sub> _Event | 2020 event distribution | 13                              | 2,801                         | 2020 event              | Y                                   |
| SO_HS_S1                     | scenario S1             | 5                               | 199                           | potential future source | N                                   |
| SO_HS_S2                     | scenario S2             | 5                               | 199                           | potential future source | N                                   |
| SO_HS_S3                     | scenario S3             | 5                               | 199                           | potential future source | N                                   |
| SO_HS_S4                     | scenario S4             | 5                               | 199                           | potential future source | N                                   |
| SO_HS_S5                     | scenario S5             | 5                               | 199                           | potential future source | N                                   |
| SO_HS <sub>tree</sub> _S1    | scenario S1             | 5                               | 199                           | potential future source | Y                                   |
| SO_HS <sub>tree</sub> _S2    | scenario S2             | 5                               | 199                           | potential future source | Y                                   |
| SO_HS <sub>tree</sub> _S3    | scenario S3             | 5                               | 199                           | potential future source | Y                                   |
| SO_HS <sub>tree</sub> _S4    | scenario S4             | 5                               | 199                           | potential future source | Y                                   |
| SO_HS <sub>tree</sub> _S5    | scenario S5             | 5                               | 199                           | potential future source | Y                                   |
| R_HS_Event                   | 2019 event distribution | 100                             | 46                            | 2019 event              | N                                   |
| R_HS <sub>frag</sub> _Event  | 2019 event distribution | 100                             | 46                            | 2019 event              | Y                                   |
| R_HS <sub>short</sub> _Event | 2019 event distribution | 100                             | 46                            | 2019 event              | N                                   |
| R_FI_S1                      | scenario S1             | 2                               | 1,323                         | potential future source | N                                   |
| RO_HS_S2                     | scenario S2             | 2                               | 1,323                         | potential future source | N                                   |
| RO_HS_S3                     | scenario S3             | 2                               | 1,323                         | potential future source | N                                   |
| RO_HS_S4                     | scenario S4             | 2                               | 1,323                         | potential future source | N                                   |
| RO_HS_S5                     | scenario S5             | 2                               | 1,323                         | potential future source | N                                   |
| RO_HS <sub>frag</sub> _S1    | scenario S1             | 2                               | 1,323                         | potential future source | Y                                   |
| RO_HS <sub>frag</sub> _S2    | scenario S2             | 2                               | 1,323                         | potential future source | Y                                   |
| RO_HS <sub>frag</sub> _S3    | scenario S3             | 2                               | 1,323                         | potential future source | Y                                   |
| RO_HS <sub>frag</sub> _S4    | scenario S4             | 2                               | 1,323                         | potential future source | Y                                   |
| RO_HS <sub>frag</sub> _S5    | scenario S5             | 2                               | 1,323                         | potential future source | Y                                   |

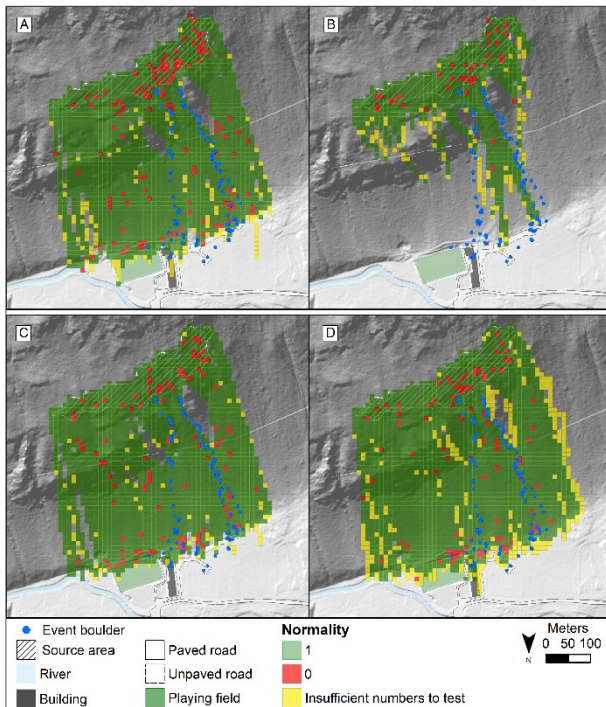

Figure S3 Normality results obtained from the Kolmogorov-Smirnov test in Saint-Oyen case study. Panel a) and b) refer to S1 scenario without and with adopting the tree-impact algorithm, respectively; panel c) and d) refer to S5 scenario without and with adopting the tree-impact algorithm, respectively

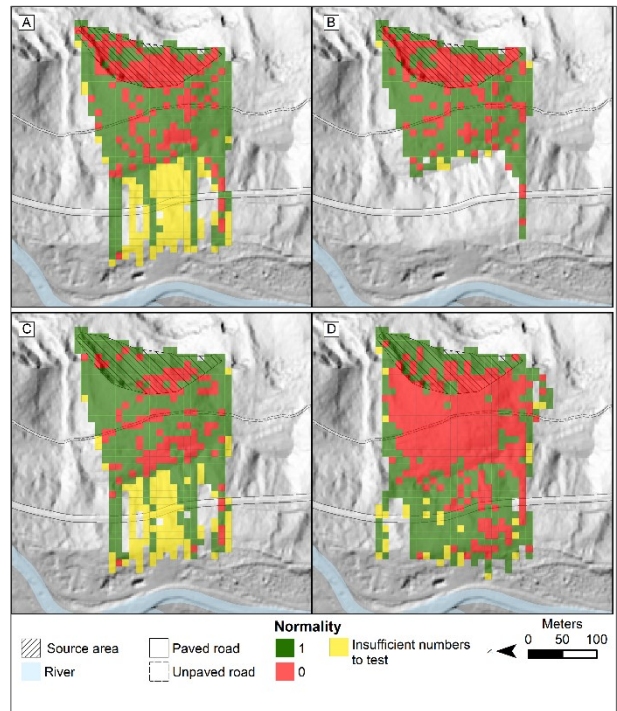

Figure S4 Normality results obtained from the Kolmogorov-Smirnov test in Roisan case study. Panel a) and b) refer to S1 scenario without and with adopting the fragmentation algorithm, respectively; panel c) and d) refer to S5 scenario without and with adopting the fragmentation algorithm, respectively.

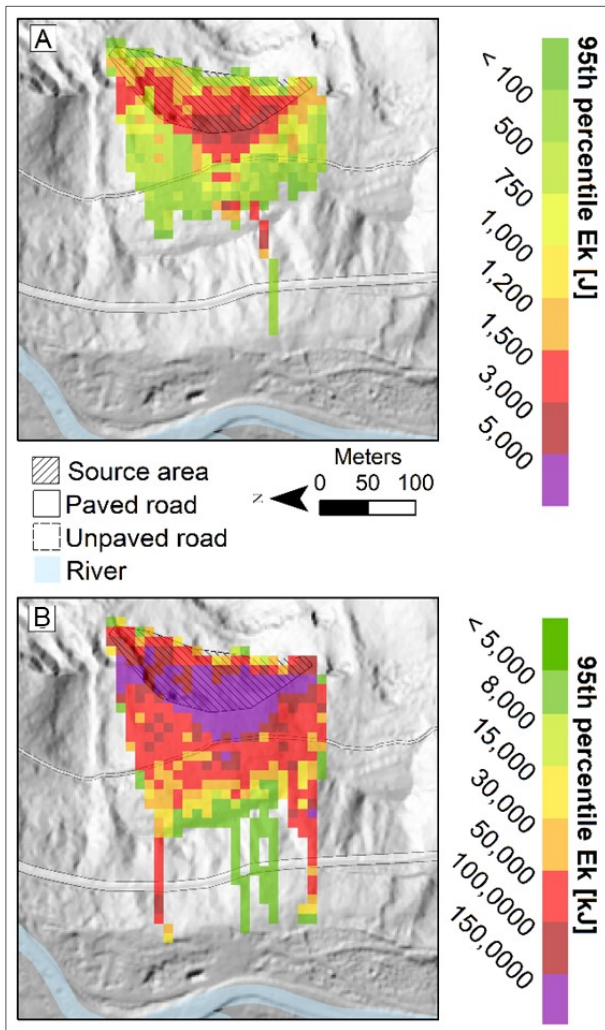

Figure S5 95<sup>th</sup> percentile values for the S1 (A) and S5 (B) scenarios with different  $HS_{short}$  model back-calibration approach. They differ from those obtained with the other calibration approach only in the models with implicit fragmentation: in A) only one trajectory passes the paved road and with lower energy than in the same case shown in *Errore. L'origine riferimento non è stata trovata.*; also in B) far fewer trajectories pass the paved road unlike the same case in *Errore. L'origine riferimento non è stata trovata.* In contrast, the scenarios modeled with the explicit fragmentation approach (Figure 4 B and D) do not differ significantly from their counterparts in because in both cases, when the fragmentation algorithm is

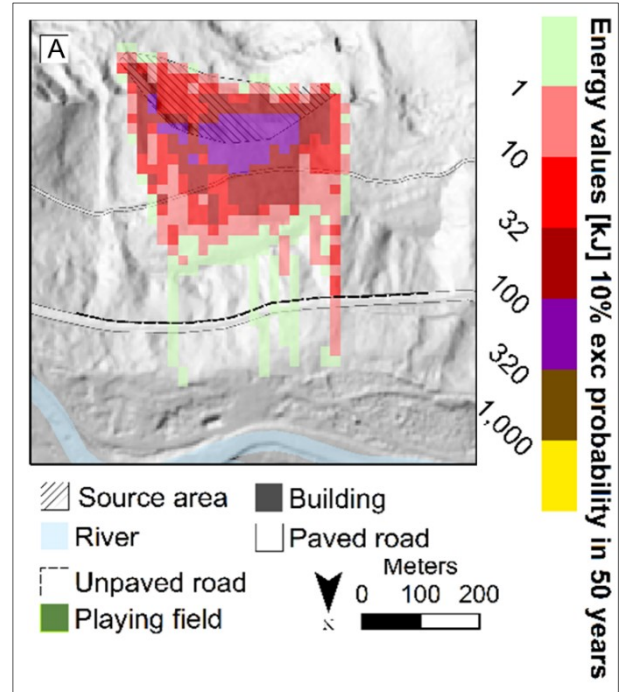

Figure S6 Hazard map for  $HS_{short}$  model. With respect to the HS model, the area involved is less sparse, crossing the paved road only in five spots. Only the rightmost corridor is characterized by an energy value associated to 10% exceedance probability in 50 years higher than 1 kJ.

activated, it is this that controls the block dynamics and thus the kinetic energies the most.

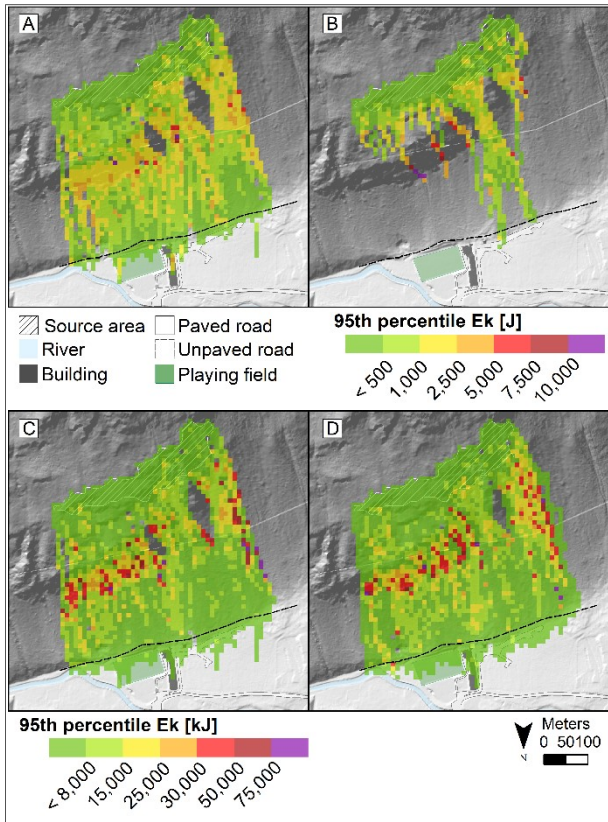

15

Figure S7 Distribution of kinetic energy of blocks along the slope in Saint-Oyen case study. The value of each cell corresponds to the 50<sup>th</sup> percentile of the kinetic energy of the blocks passing through that cell. Box A) scenario S1 (small blocks) HS, B) scenario S1 (small blocks) HS<sub>frag</sub>, C) scenario S5 (large blocks) HS, D) scenario S5 (large blocks) HS<sub>frag</sub>.

20

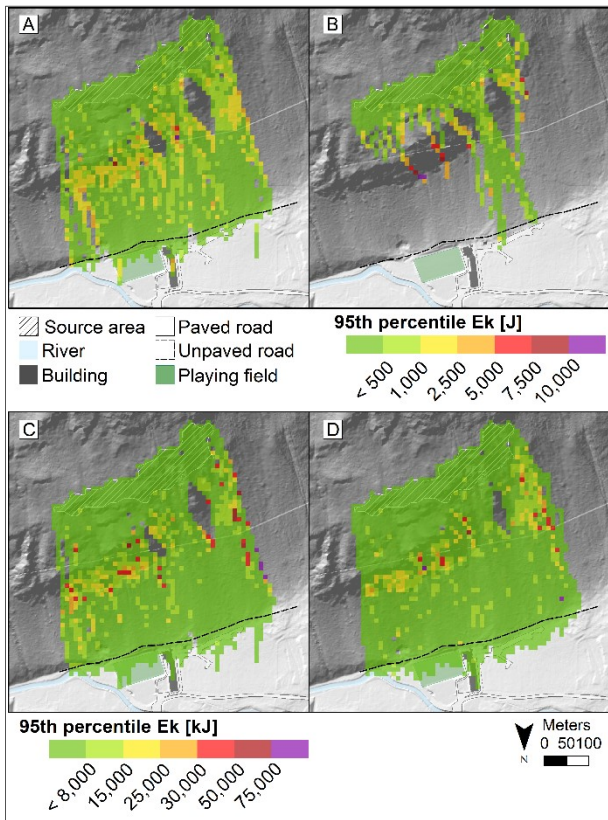

25 *Figure S8 Distribution of kinetic energy of blocks along the slope in Saint-Oyen case study. The value of each cell corresponds to the 25<sup>th</sup> percentile of the kinetic energy of the blocks passing through that cell. Box A) scenario S1 (small blocks) HS, B) scenario S1 (small blocks) HS<sub>frag</sub>.*



30 C) scenario S5 (large blocks) HS, D) scenario S5 (large blocks) HS<sub>frag</sub>.

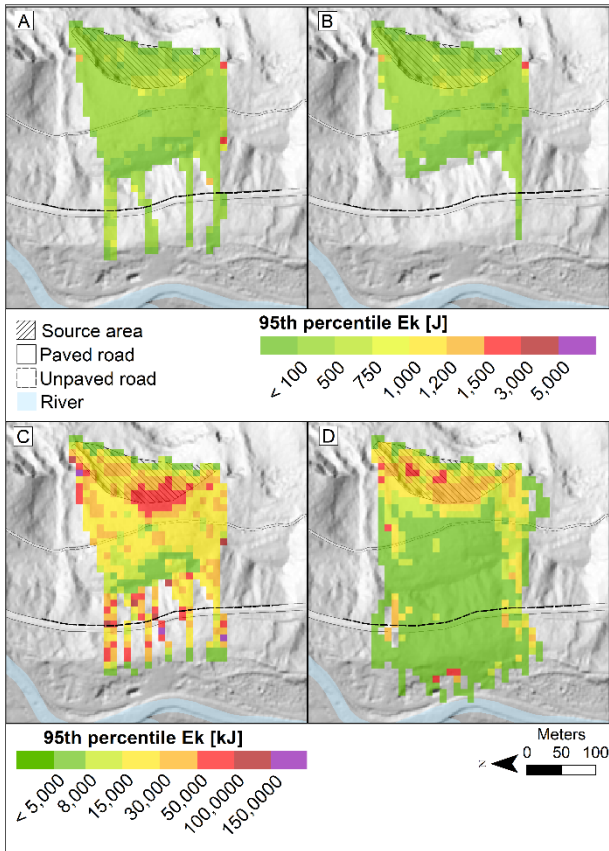

35 Figure S9 Distribution of kinetic energy of blocks along the slope in Roisan case study. The value of each cell corresponds to the 50<sup>th</sup> percentile of the kinetic energy of the blocks passing through that cell. Box A) scenario S1 (small blocks) HS, B) scenario S1 (small blocks) HS<sub>frag</sub>,  
40 C) scenario S5 (large blocks) HS, D) scenario S5 (large blocks) HS<sub>frag</sub>.

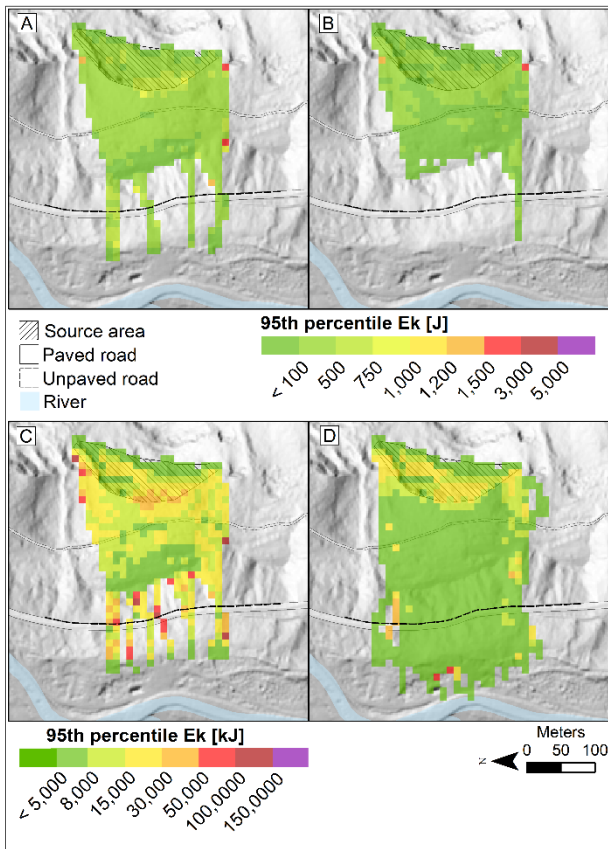

45 *Figure S10 Distribution of kinetic energy of blocks along the slope in Roisan case study. The value of each cell corresponds to the 25<sup>th</sup> percentile of the kinetic energy of the blocks passing through that cell. Box A) scenario S1 (small blocks) HS, B) scenario S1 (small blocks) HS<sub>frag</sub>, C) scenario S5 (large blocks) HS, D) scenario S5 (large blocks) HS<sub>frag</sub>.*

50

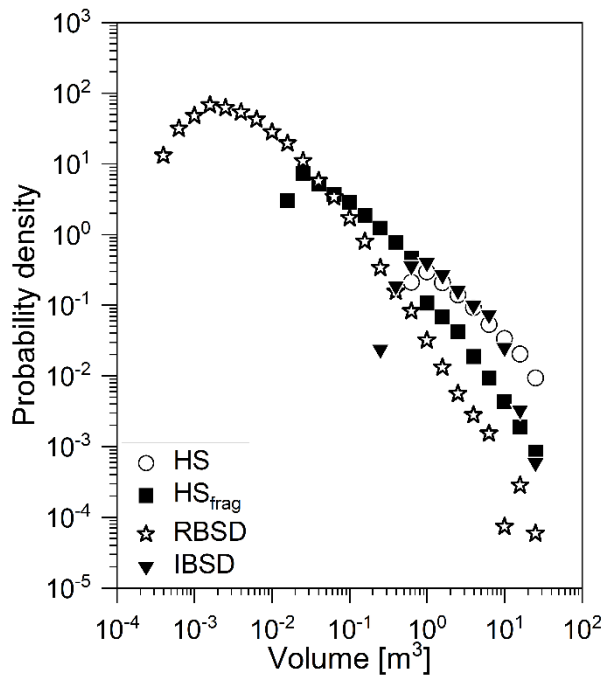

Figure S11 Comparison of the distributions of block size distributions surveyed in Roisan case study (IBSD and RBSD) and the simulated ones (HS and HS<sub>frag</sub>)
